# Supplementary material for: Development and Validation of a Risk Score Model for Predicting the Cardiovascular Outcomes After Breast Cancer Therapy: The CHEMO‐RADIAT Score
Source: PubMed Central journal article supplement — J Am Heart Assoc. 2021 Aug 7;10(16):e021931. doi: 10.1161/JAHA.121.021931 (PMC8475066; doi:10.1161/jaha.121.021931), 2021-08-07

# **SUPPLEMENTAL MATERIAL**

**Figure S1. Decision curves for the predictive model based on the conventional cardiovascular (CV) risk factors and CHEMO-RADIAT scores in the validation cohort.**

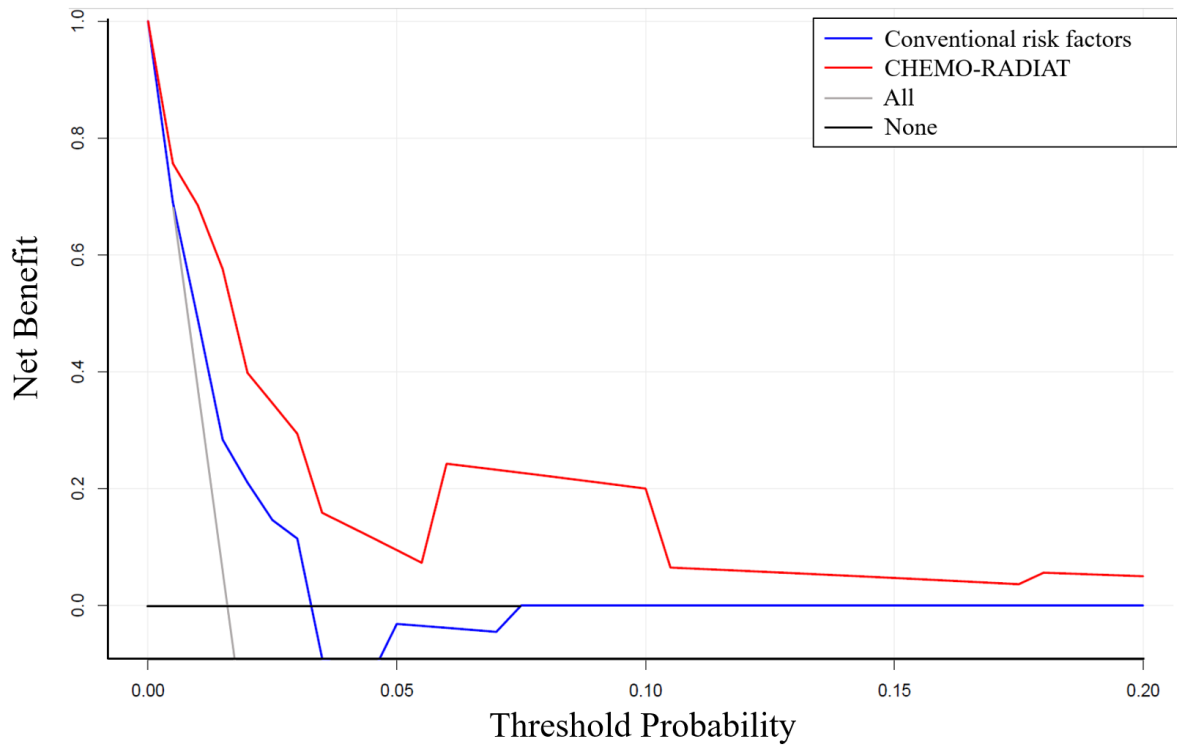

Supplement: JAH3-10-e021931-s001.pdf [file JAH3-10-e021931-s001.pdf]
